# Supplementary material for: Brain–gut communications via distinct neuroendocrine signals bidirectionally regulate longevity in C. elegans
Source: PubMed Central journal article supplement — Genes Dev. 2018 Feb 1;32(3-4):258–70. doi: 10.1101/gad.309625.117 (PMC5859967; doi:10.1101/gad.309625.117), 2018-02-01
Supplement: supp_32.3-4.258_Supplemental_Figure_S1.pdf [file supp_32.3-4.258_Supplemental_Figure_S1.pdf]

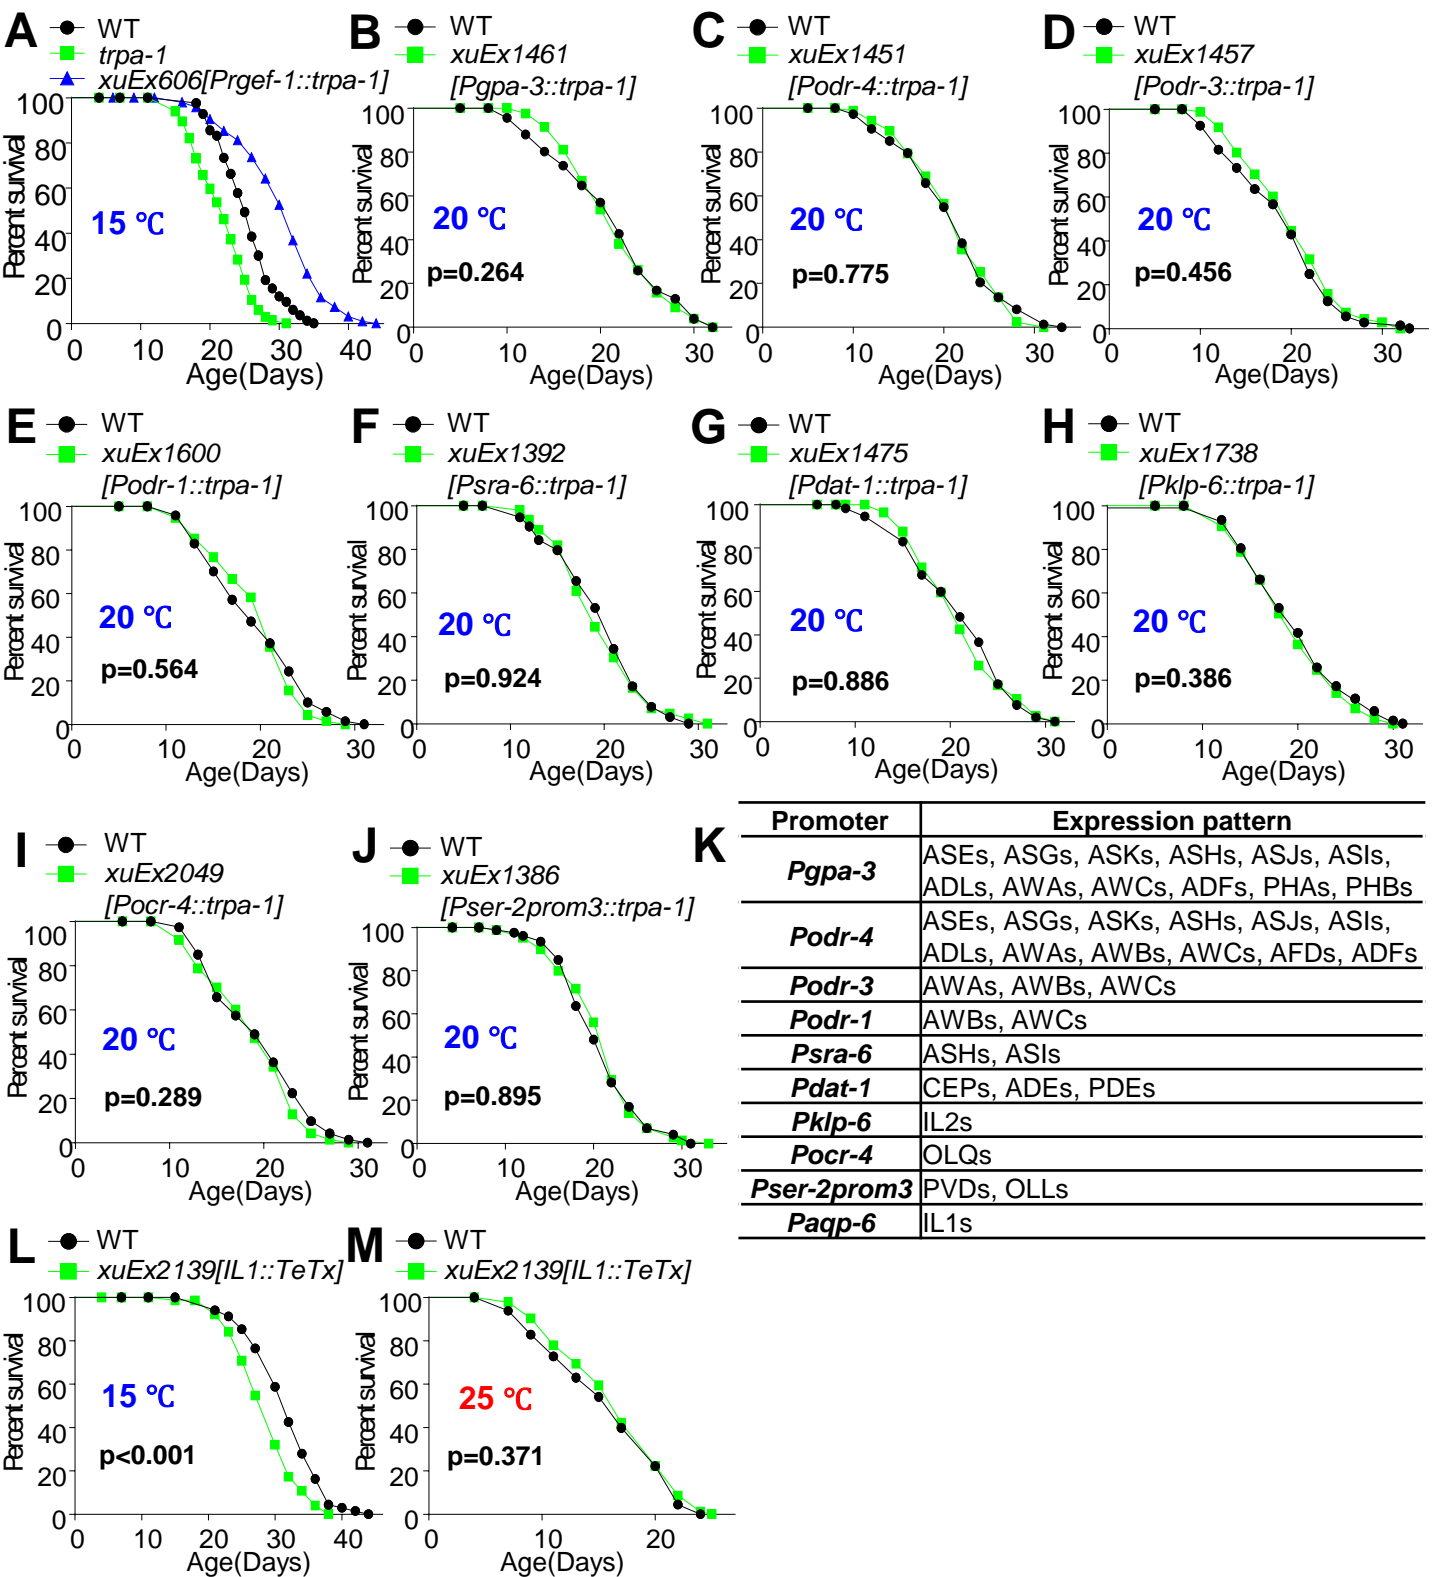

**Figure S1. Expression of TRPA-1 in other sensory neurons does not promote lifespan at cool temperatures. (A)** *trpa-1* mutant worms are short-lived at 15 °C, and *trpa-1* transgene can extend lifespan at 15 °C. **(B-J)** Transgenic expression of TRPA-1 in various sensory neurons using different sensory neuron promoters does not extend lifespan. **(K)** Table summarizing the neurons marked by the promoters used above in (B-J). **(L-M)** Blocking the output of IL1 neurons by TeTx shortens lifespan at 15 °C (L), but not at 25 °C (M).
