# Supplementary material for: Brain–gut communications via distinct neuroendocrine signals bidirectionally regulate longevity in C. elegans
Source: PubMed Central journal article supplement — Genes Dev. 2018 Feb 1;32(3-4):258–70. doi: 10.1101/gad.309625.117 (PMC5859967; doi:10.1101/gad.309625.117), 2018-02-01
Supplement: supp_32.3-4.258_Supplemental_Figure_S3.pdf [file supp_32.3-4.258_Supplemental_Figure_S3.pdf]

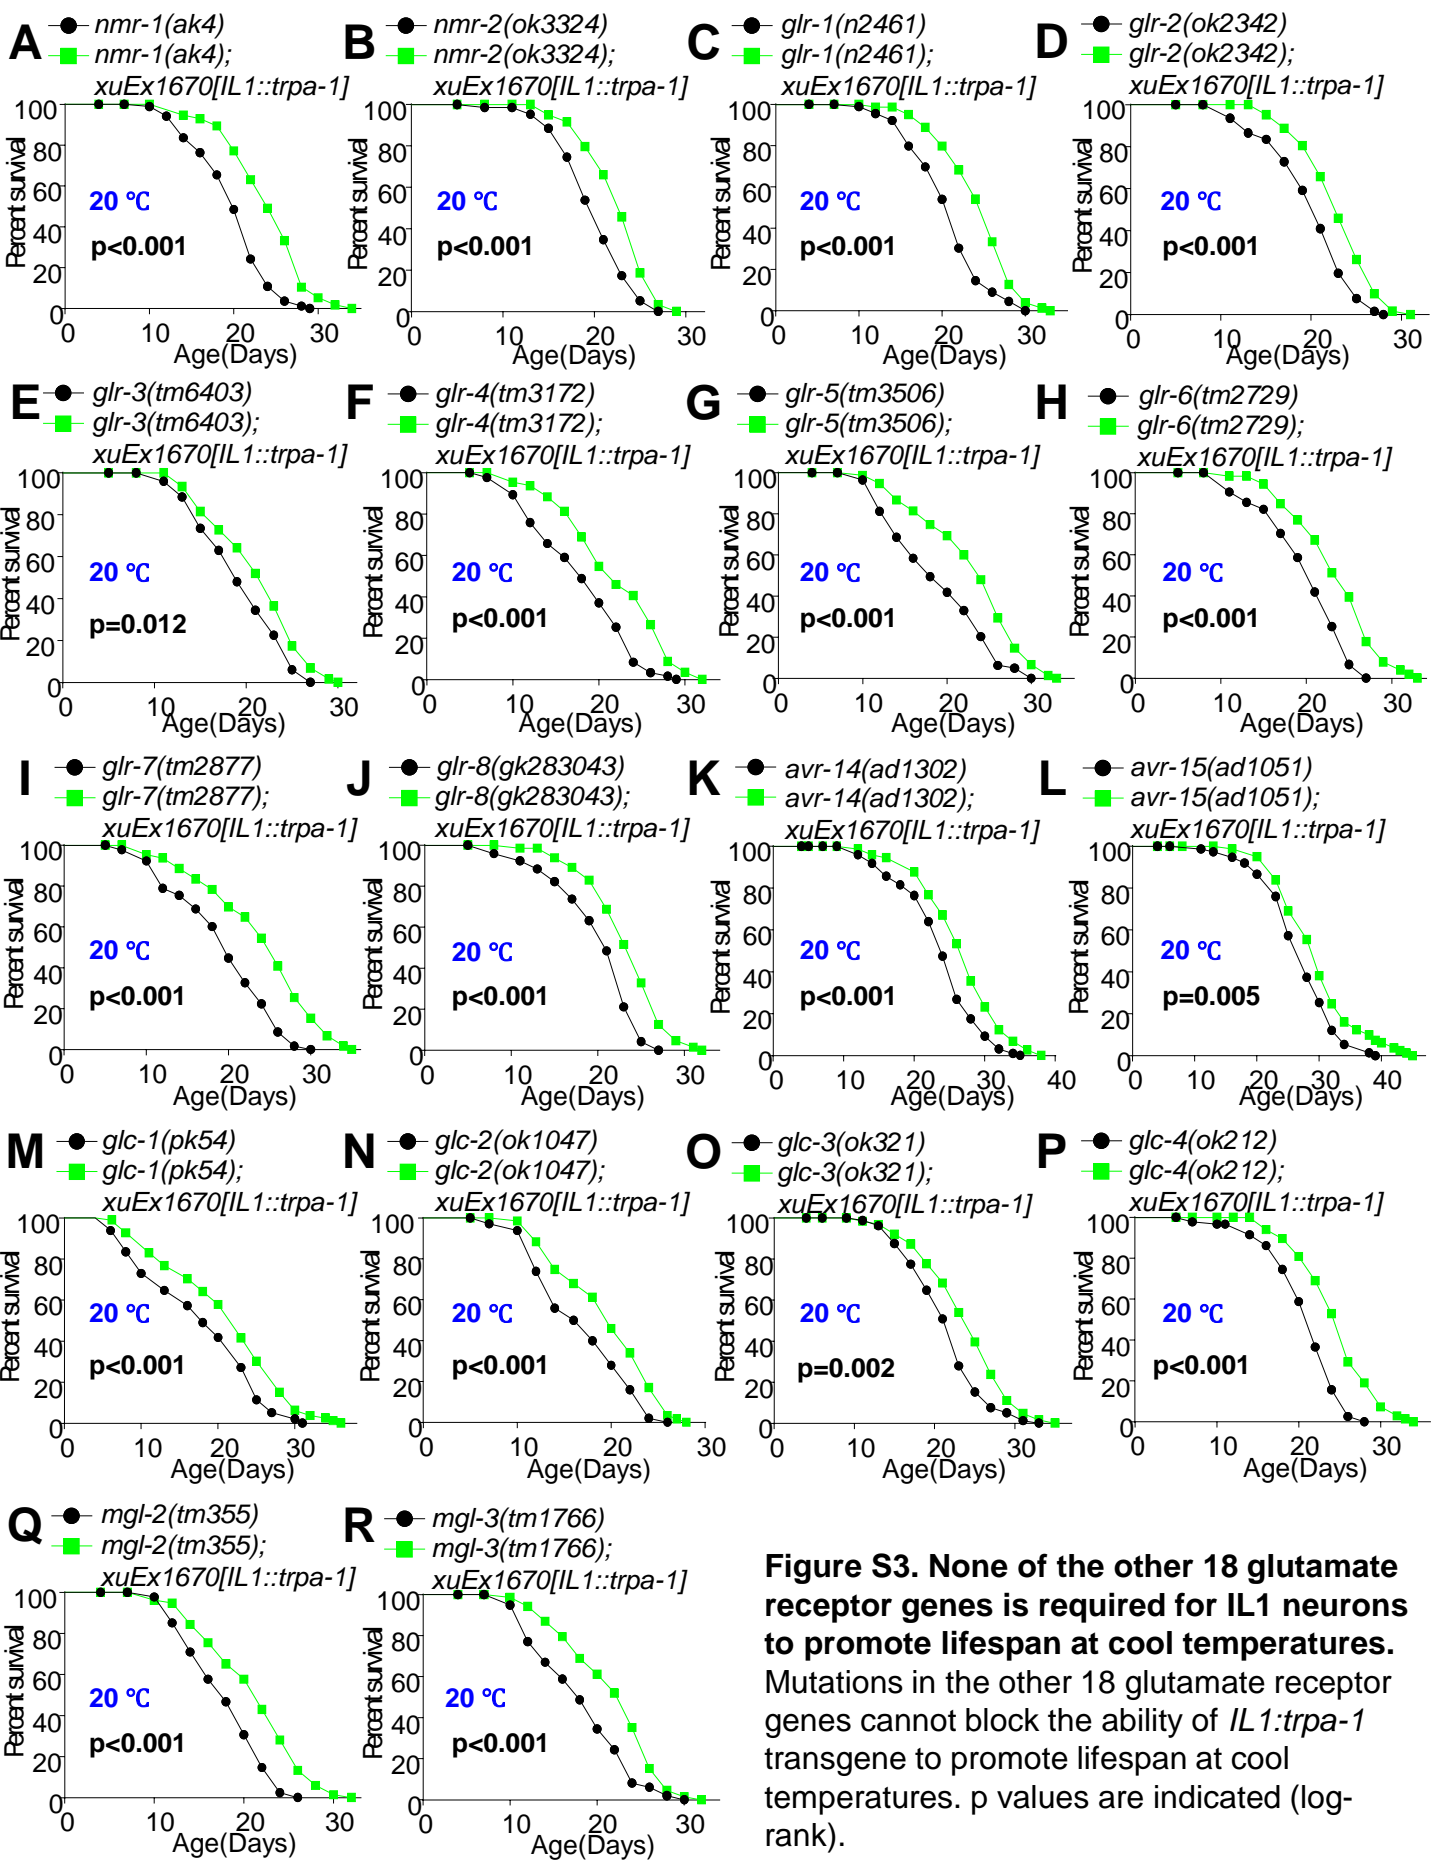

**Figure S3. None of the other 18 glutamate receptor genes is required for IL1 neurons to promote lifespan at cool temperatures. Mutations in the other 18 glutamate receptor genes cannot block the ability of *IL1::trpa-1* transgene to promote lifespan at cool temperatures. p values are indicated (log-rank).**
