# Supplementary material for: Brain–gut communications via distinct neuroendocrine signals bidirectionally regulate longevity in C. elegans
Source: PubMed Central journal article supplement — Genes Dev. 2018 Feb 1;32(3-4):258–70. doi: 10.1101/gad.309625.117 (PMC5859967; doi:10.1101/gad.309625.117), 2018-02-01
Supplement: supp_32.3-4.258_Supplemental_Figure_S4.pdf [file supp_32.3-4.258_Supplemental_Figure_S4.pdf]

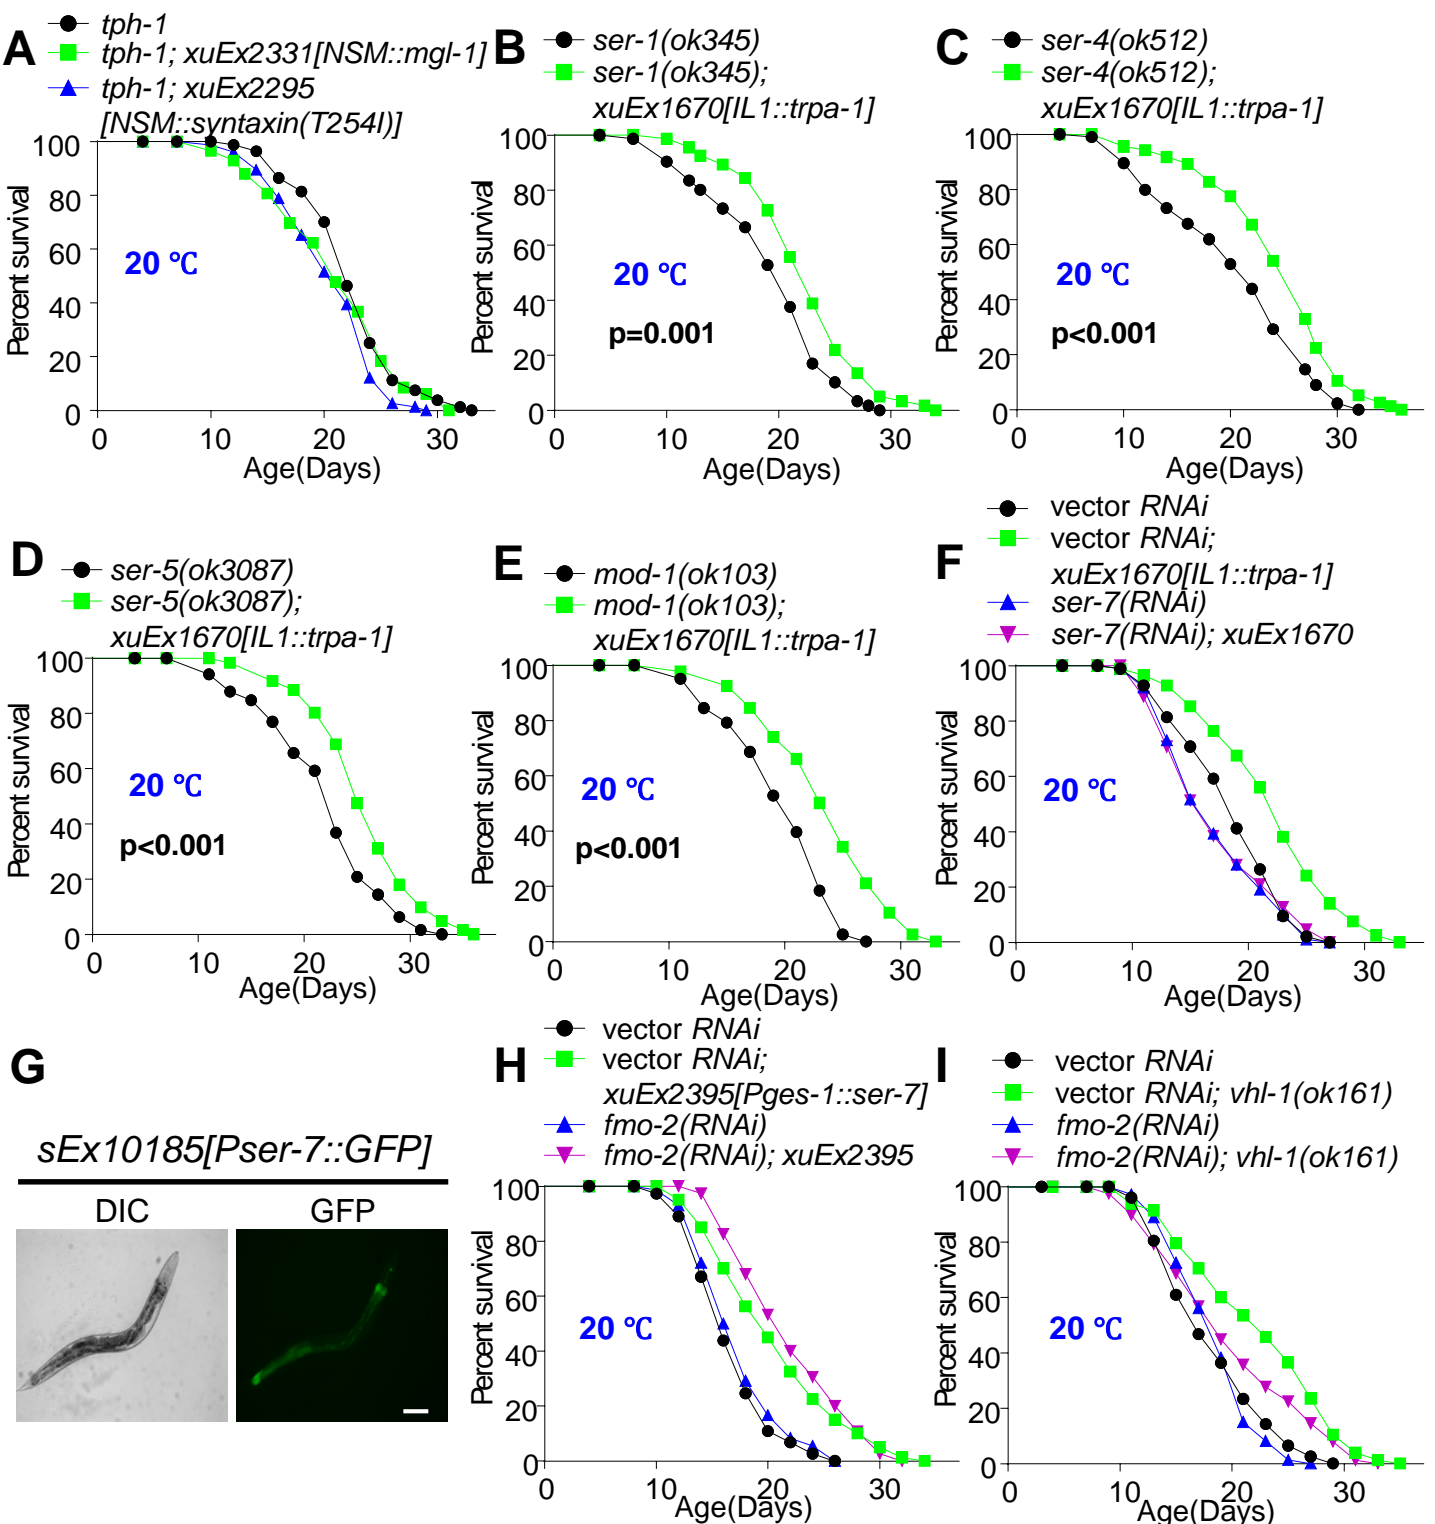

**Figure S4. Additional data on NSM neurons and serotonin receptors. (A)** Promotion of lifespan by NSM neurons via *NSM::syntaxin(T254I)* and *NSM::mgl-1* transgenes is suppressed by loss of *tph-1* (*tph-1; xuEx2331* vs. *tph-1*:  $p=0.391$ ; *tph-1; xuEx2295* vs. *tph-1*:  $p=0.085$ ). **(B-E)** Mutations in the other four serotonin receptor genes cannot block the ability of *IL1::trpa-1* transgene to promote lifespan at cool temperature. **(F)** RNAi of *ser-7* blocks the ability of IL1 neurons to promote lifespan. **(G)** *ser-7* is expressed in the intestine. **(H)** Transgenic expression of SER-7 in the intestine (*Pges-1::ser-7*) extends lifespan ( $p<0.001$ ), but this effect cannot be blocked by *fmo-2* RNAi ( $p<0.001$ ). **(I)** As a positive control, *fmo-2* RNAi can suppress the long-lived phenotype of *vhl-1* mutant worms ( $p=0.031$ ).  $p$  values are indicated (log-rank).
