# Supplementary material for: Brain–gut communications via distinct neuroendocrine signals bidirectionally regulate longevity in C. elegans
Source: PubMed Central journal article supplement — Genes Dev. 2018 Feb 1;32(3-4):258–70. doi: 10.1101/gad.309625.117 (PMC5859967; doi:10.1101/gad.309625.117), 2018-02-01
Supplement: supp_32.3-4.258_Supplemental_Figure_S5.pdf [file supp_32.3-4.258_Supplemental_Figure_S5.pdf]

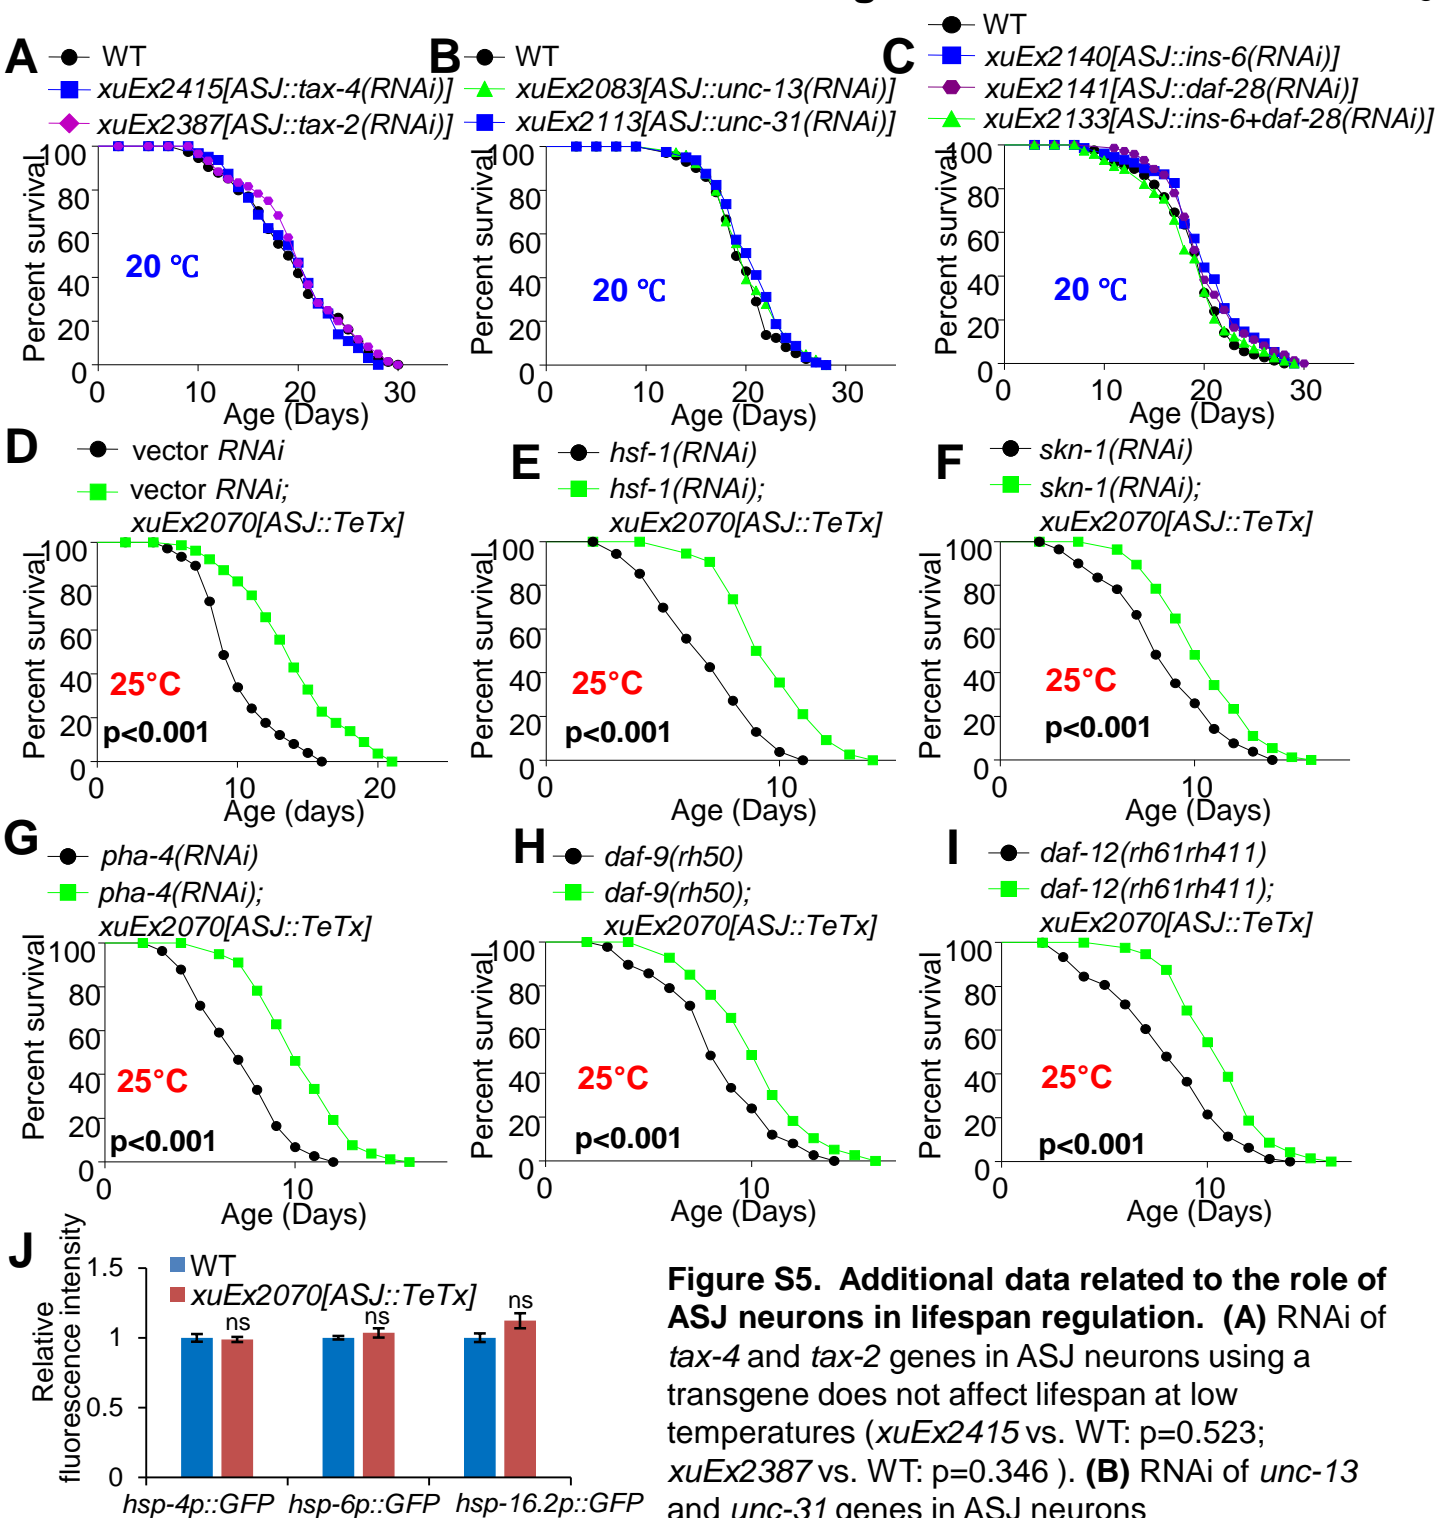

**Figure S5. Additional data related to the role of ASJ neurons in lifespan regulation.** (A) RNAi of *tax-4* and *tax-2* genes in ASJ neurons using a transgene does not affect lifespan at low temperatures (*xuEx2415* vs. WT:  $p=0.523$ ; *xuEx2387* vs. WT:  $p=0.346$ ). (B) RNAi of *unc-13* and *unc-31* genes in ASJ neurons

using a transgene does not affect lifespan at low temperatures (*xuEx2083* vs. WT:  $p=0.487$ ; *xuEx2113* vs. WT:  $p=0.367$ ). (C) RNAi of *ins-6* and *daf-28* genes in ASJ neurons using a transgene does not affect lifespan at low temperatures (*xuEx2140* vs. WT:  $p=0.211$ ; *xuEx2141* vs. WT:  $p=0.301$ ; *xuEx2133* vs. WT:  $p=0.543$ ). (D-I) Deficiency in other lifespan-regulating transcription factors, such as HSF-1, SKN-1, PHA-4, and DAF-9/DAF-12 does not block the ability of ASJ neurons to regulate lifespan at warm temperature.  $p$  values are indicated (log-rank). (J) *hsp-4p*::GFP (UPR<sup>ER</sup> reporter), *hsp-6p*::GFP (UPR<sup>mt</sup> reporter), and *hsp-16.2p*::GFP (HSR reporter) are not up-regulated in worms expressing ASJ::*TeTx* transgene.  $n \geq 35$ . Error bars: SEM. Experiments were performed at 25 °C.
