# Supplementary material for: Brain–gut communications via distinct neuroendocrine signals bidirectionally regulate longevity in C. elegans
Source: PubMed Central journal article supplement — Genes Dev. 2018 Feb 1;32(3-4):258–70. doi: 10.1101/gad.309625.117 (PMC5859967; doi:10.1101/gad.309625.117), 2018-02-01
Supplement: supp_32.3-4.258_Supplemental_Figure_S6.pdf [file supp_32.3-4.258_Supplemental_Figure_S6.pdf]

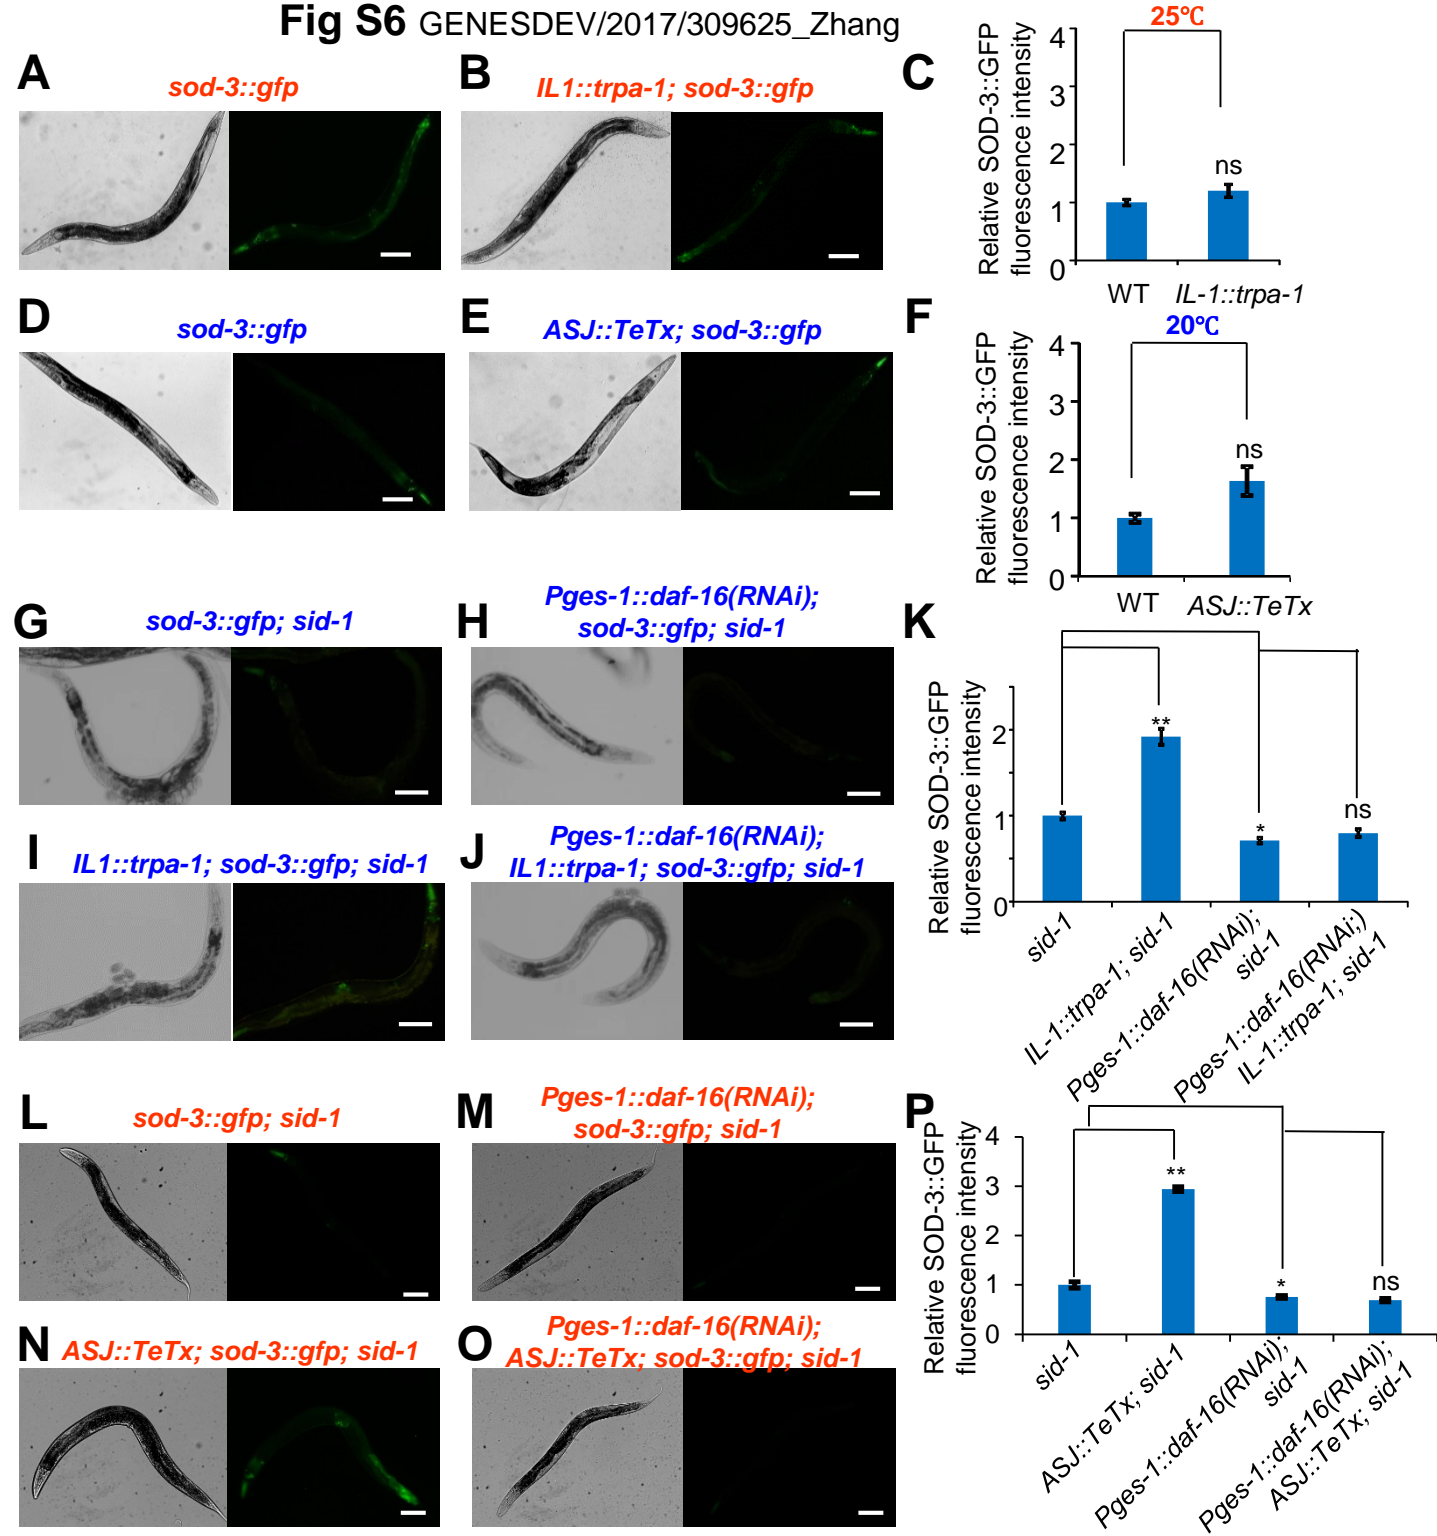

**Figure S6. Additional data on SOD-3::GFP reporter expression. (A-C)** Stimulation of IL1 neurons does not promote the expression level of the DAF-16 target gene *sod-3* at 25 °C. (A-B) Sample images. Left: DIC. Right: fluorescence. (C) Bar graph. Error bars: SEM.  $n \geq 32$ .  $p = 0.119$  (t test). **(D-F)** Inhibition of ASJ neuron output does not promote the expression of the DAF-16 target gene *sod-3* at 20 °C. Error bars: SEM.  $n \geq 30$ .  $p = 0.094$  (t test). **(G-K)** RNAi of *daf-16* specifically in the intestine blocks the ability of IL1 neurons to up-regulate SOD-3::GFP expression at 20 °C. *sid-1* (*qt9*) blocks the spread of dsRNA to other tissues.  $n \geq 20$ . \* $p < 0.05$ ; \*\* $p < 0.005$  (ANOVA with Bonferroni test). **(L-P)** RNAi of *daf-16* specifically in the intestine blocks the ability of ASJ neurons to up-regulate SOD-3::GFP expression at 25 °C. *sid-1* (*qt9*) blocks the spread of dsRNA to other tissues.  $n \geq 25$ . \* $p < 0.05$ ; \*\* $p < 0.005$  (ANOVA with Bonferroni test). Scale bar: 100  $\mu$ m.
