# Supplementary material for: Brain–gut communications via distinct neuroendocrine signals bidirectionally regulate longevity in C. elegans
Source: PubMed Central journal article supplement — Genes Dev. 2018 Feb 1;32(3-4):258–70. doi: 10.1101/gad.309625.117 (PMC5859967; doi:10.1101/gad.309625.117), 2018-02-01
Supplement: supp_32.3-4.258_Supplemental_Figure_S7.pdf [file supp_32.3-4.258_Supplemental_Figure_S7.pdf]

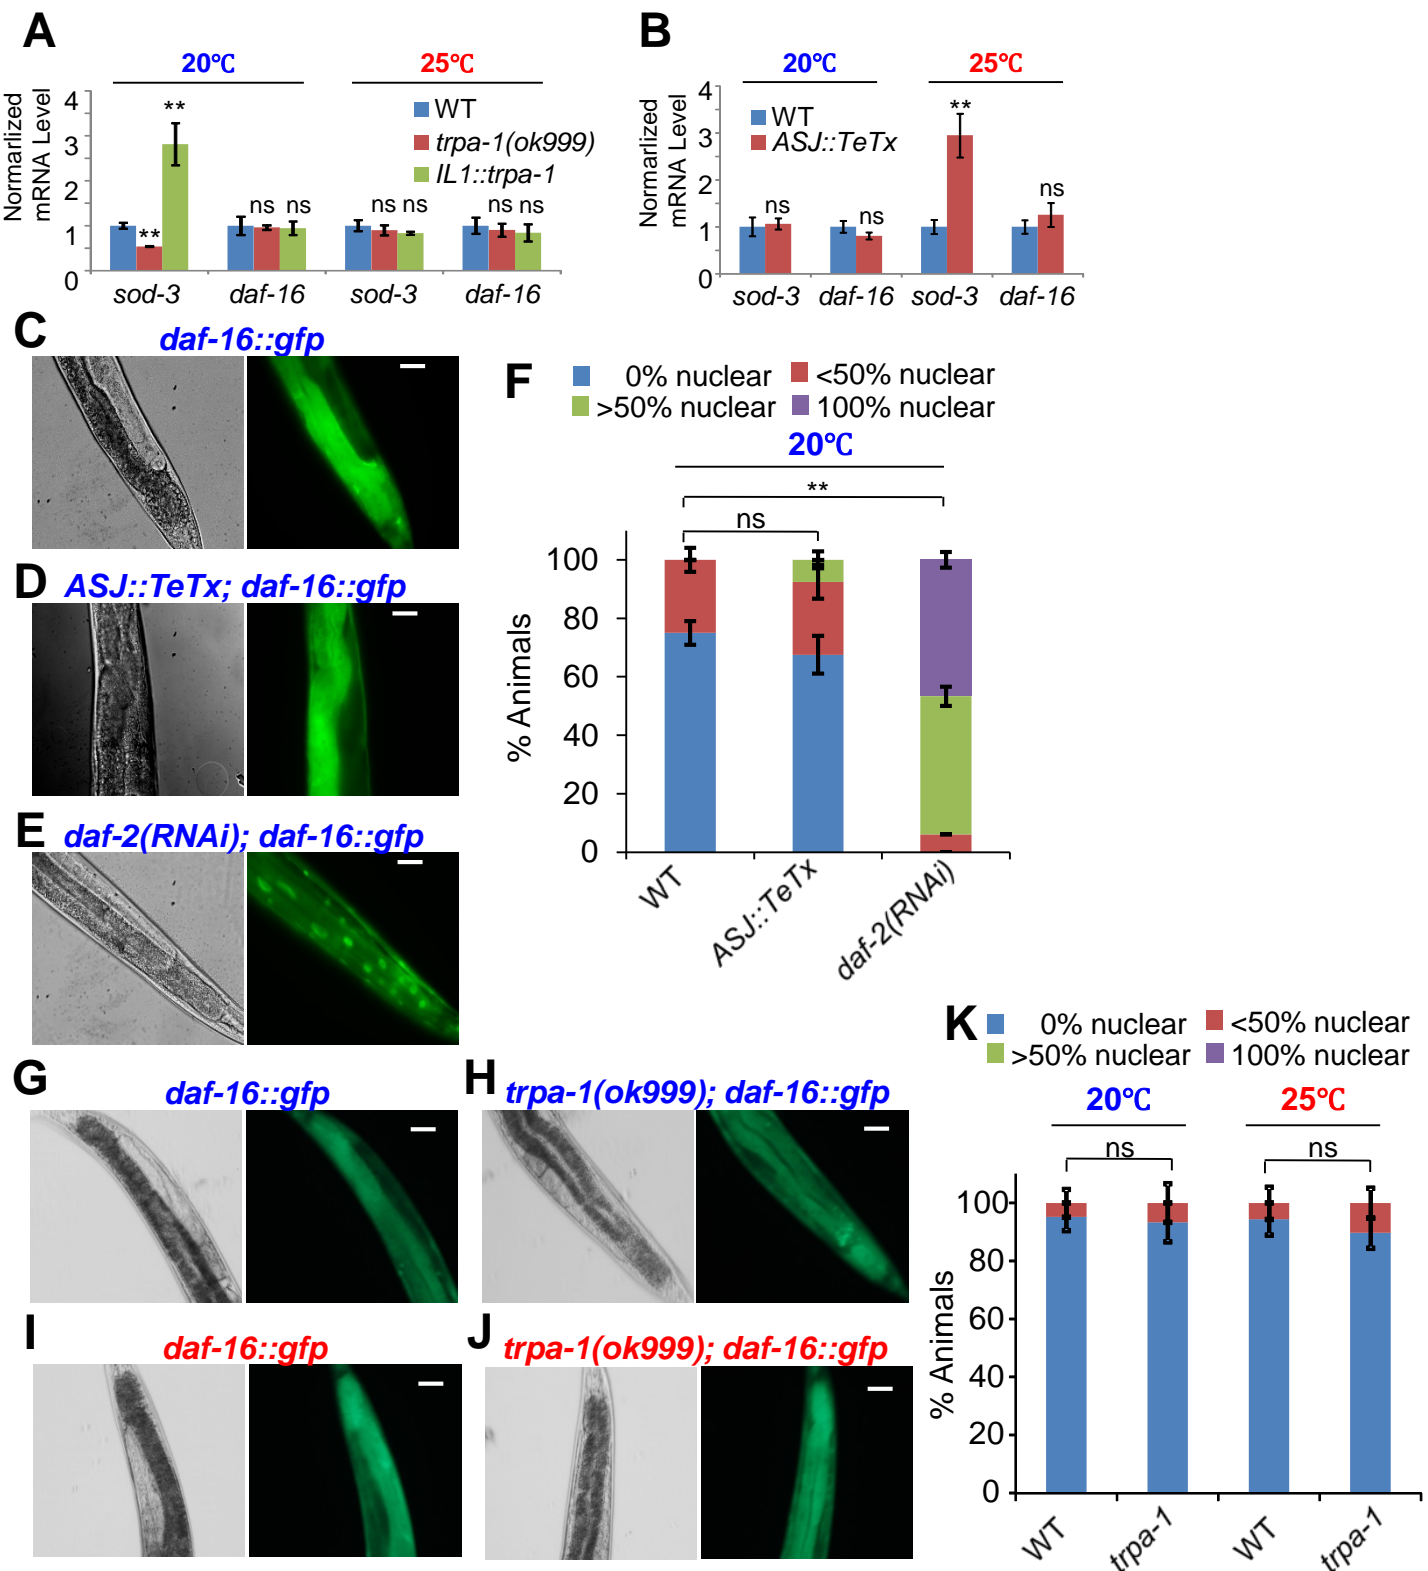

**Figure S7. Additional data on *sod-3* expression and DAF-16 nuclear translocation. (A-B)** qPCR analysis of *sod-3* and *daf-16* expression levels. qPCR reactions were run in triplicates and repeated three times. **(C-F)** Inhibition of ASJ neuron output does not promote nuclear translocation of DAF-16 at 20 °C. Sample images. Left: DIC. Right: fluorescence. *daf-2(RNAi)* serves as a positive control. Error bars: SEM.  $n \geq 64$ .  $**p < 0.001$  (Pearson's chi-square test). Data were quantified as in Figure 7J. **(G-K)** *trpa-1(ok999)* null mutation does not affect nuclear translocation of DAF-16 at 20 °C (G-H) or 25 °C (I-J).  $n \geq 50$ . Error bars: SEM > Scale bar: 100  $\mu$ m.
