# Supplementary material for: Brain–gut communications via distinct neuroendocrine signals bidirectionally regulate longevity in C. elegans
Source: PubMed Central journal article supplement — Genes Dev. 2018 Feb 1;32(3-4):258–70. doi: 10.1101/gad.309625.117 (PMC5859967; doi:10.1101/gad.309625.117), 2018-02-01
Supplement: supp_32.3-4.258_Supplemental_Table_S1.pdf [file supp_32.3-4.258_Supplemental_Table_S1.pdf]

Table S1 GENESDEV/2017/309625\_Zhang

| Strain                           | Temp (°C) | Mean Lifespan ± SEM | Median Lifespan | N(assaye d/total) | P Value against control | Figure |
|----------------------------------|-----------|---------------------|-----------------|-------------------|-------------------------|--------|
| WT                               | 20        | 18.98±0.55          | 19              | 75/103            | —                       | 1a     |
| <i>trpa-1(ok999)</i>             | 20        | 15.55±0.52          | 17              | 59/90             | <0.001                  | 1a     |
| <i>xuEx606[Prgef-1::trpa-1]</i>  | 20        | 22.26±0.71          | 23              | 76/101            | <0.001                  | 1a     |
| WT                               | 20        | 20.83±0.80          | 21              | 66/90             | —                       | Exp.2  |
| <i>trpa-1(ok999)</i>             | 20        | 18.45±0.43          | 19              | 85/115            | <0.001                  |        |
| <i>xuEx606[Prgef-1::trpa-1]</i>  | 20        | 23.35±0.84          | 23              | 72/93             | 0.018                   |        |
| WT                               | 25        | 12.79±0.53          | 10              | 84/107            | —                       | 1b     |
| <i>trpa-1(ok999)</i>             | 25        | 13.40±0.61          | 13              | 42/80             | 0.965                   | 1b     |
| <i>xuEx606[Prgef-1::trpa-1]</i>  | 25        | 12.74±0.54          | 12              | 89/106            | 0.800                   | 1b     |
| WT                               | 25        | 14.36±0.50          | 15              | 65/90             | —                       | Exp.2  |
| <i>trpa-1(ok999)</i>             | 25        | 13.46±0.60          | 14              | 49/72             | 0.197                   |        |
| <i>xuEx606[Prgef-1::trpa-1]</i>  | 25        | 14.67±0.53          | 13              | 117/136           | 0.097                   |        |
| WT                               | 20        | 20.41±0.56          | 20              | 54/91             | —                       | 1c     |
| <i>xuEx1372[Posm-6::trpa-1]</i>  | 20        | 24.46±0.62          | 24              | 50/80             | <0.001                  | 1c     |
| WT                               | 20        | 19.75±0.57          | 21              | 65/92             | —                       | Exp.2  |
| <i>xuEx1372[Posm-6::trpa-1]</i>  | 20        | 25.09±0.82          | 26              | 54/78             | <0.001                  |        |
| WT                               | 20        | 20.41±0.56          | 20              | 54/91             | —                       | 1d     |
| <i>xuEx1382[Pglr-1::trpa-1]</i>  | 20        | 20.40±0.72          | 21              | 58/75             | 0.526                   | 1d     |
| <i>xuEx1362[Pacr-2::trpa-1]</i>  | 20        | 21.82±0.66          | 21              | 67/90             | 0.138                   | 1d     |
| <i>xuEx1366[Punc-25::trpa-1]</i> | 20        | 20.08±0.37          | 20              | 83/112            | 0.475                   | 1d     |
| WT                               | 20        | 19.70±0.70          | 19              | 67/97             | —                       | Exp.2  |
| <i>xuEx1382[Pglr-1::trpa-1]</i>  | 20        | 20.54±0.65          | 21              | 66/102            | 0.555                   |        |
| <i>xuEx1362[Pacr-2::trpa-1]</i>  | 20        | 19.06±0.67          | 19              | 56/85             | 0.390                   |        |
| <i>xuEx1366[Punc-25::trpa-1]</i> | 20        | 19.27±0.34          | 18              | 62/96             | 0.070                   |        |
| WT                               | 20        | 19.85±0.57          | 20              | 77/106            | —                       | 1e     |
| <i>xuEx1670[IL1::trpa-1]</i>     | 20        | 23.93±0.78          | 24              | 61/97             | <0.001                  | 1e     |
| WT                               | 20        | 19.74±0.48          | 20              | 76/104            | —                       | Exp.2  |
| <i>xuEx1670[IL1::trpa-1]</i>     | 20        | 22.96±0.56          | 24              | 74/102            | <0.001                  |        |
| WT                               | 25        | 13.62±0.58          | 12              | 86/108            | —                       | 1f     |
| <i>xuEx1670[IL1::trpa-1]</i>     | 25        | 13.74±0.56          | 14              | 91/102            | 0.876                   | 1f     |
| WT                               | 25        | 12.20±0.44          | 10              | 91/105            | —                       | Exp.2  |
| <i>xuEx1670[IL1::trpa-1]</i>     | 25        | 12.22±0.40          | 12              | 96/104            | 0.494                   |        |
| WT                               | 20        | 21.49±0.56          | 22              | 125/157           | —                       | 1g     |
| <i>trpa-1(ok999)</i>             | 20        | 18.56±0.56          | 28              | 70/99             | <0.001                  | 1g     |
| <i>trpa-1(ok999); xuEx1670</i>   | 20        | 23.00±0.79          | 24              | 69/101            | 0.171                   | 1g     |
| WT                               | 20        | 21.10±0.52          | 22              | 74/99             | —                       | Exp.2  |
| <i>trpa-1(ok999)</i>             | 20        | 19.05±0.61          | 20              | 72/99             | 0.045                   |        |

Table S1 GENESDEV/2017/309625\_Zhang

|                                                  |    |            |    |         |        |       |
|--------------------------------------------------|----|------------|----|---------|--------|-------|
| <i>trpa-1(ok999); xuEx1670</i>                   | 20 | 22.53±0.79 | 23 | 47/72   | 0.034  |       |
| WT                                               | 20 | 21.46±0.57 | 20 | 54/90   | —      | 1k    |
| <i>xuEx2139[IL1::TeTx]</i>                       | 20 | 18.55±0.54 | 22 | 64/91   | <0.001 | 1k    |
| WT                                               | 20 | 18.50±0.59 | 19 | 74/101  | —      | Exp.2 |
| <i>xuEx2139[IL1::TeTx]</i>                       | 20 | 16.76±0.50 | 17 | 68/96   | 0.008  |       |
| WT                                               | 20 | 17.73±0.59 | 18 | 64/99   | —      | 1l    |
| <i>xuEx2367[IL1::syntaxin(T254I)]</i>            | 20 | 24.47±0.71 | 24 | 77/103  | <0.001 | 1l    |
| WT                                               | 20 | 19.52±0.67 | 20 | 49/82   | —      | Exp.2 |
| <i>xuEx2367[IL1::syntaxin(T254I)]</i>            | 20 | 23.23±0.87 | 24 | 52/78   | <0.001 |       |
| WT                                               | 20 | 18.91±0.72 | 20 | 65/89   | —      | 1m    |
| <i>xuEx1670[IL1::trpa-1]</i>                     | 20 | 22.50±0.82 | 24 | 60/90   | <0.001 | 1m    |
| <i>daf-16(mgDf47)</i>                            | 20 | 15.12±0.44 | 14 | 82/98   | <0.001 | 1m    |
| <i>daf-16(mgDf47); xuEx1670[IL1::trpa-1]</i>     | 20 | 15.79±0.50 | 16 | 65/90   | <0.001 | 1m    |
| WT                                               | 20 | 20.40±0.64 | 21 | 63/90   | —      | Exp.2 |
| <i>xuEx1670[IL1::trpa-1]</i>                     | 20 | 22.83±0.66 | 23 | 68/90   | 0.006  |       |
| <i>daf-16(mgDf47)</i>                            | 20 | 15.82±0.33 | 17 | 82/100  | <0.001 |       |
| <i>daf-16(mgDf47); xuEx1670[IL1::trpa-1]</i>     | 20 | 15.24±0.34 | 15 | 79/90   | <0.001 |       |
| WT                                               | 20 | 19.89±0.41 | 20 | 78/106  | —      | 1n    |
| <i>xuEX1670[IL1::trpa-1]</i>                     | 20 | 23.30±0.52 | 24 | 73/99   | <0.001 | 1n    |
| <i>daf-16(mgDf47)</i>                            | 20 | 16.69±0.29 | 18 | 84/101  | <0.001 | 1n    |
| <i>daf-16(mgDf47); xuEx1670[IL1::trpa-1]</i>     | 20 | 16.47±0.33 | 18 | 77/101  | <0.001 | 1n    |
| <i>daf-16(mgDf47); xuEx2302[Pges-1::daf-16]</i>  | 20 | 22.29±0.53 | 22 | 77/106  | <0.001 | 1n    |
| <i>daf-16(mgDf47); xuEx2302; xuEx1670</i>        | 20 | 24.77±0.71 | 26 | 46/72   | <0.001 | 1n    |
| WT                                               | 20 | 19.10±0.51 | 19 | 78/106  | —      | 1o    |
| <i>xuEX1670[IL1::trpa-1]</i>                     | 20 | 22.54±0.55 | 23 | 62/90   | <0.001 | 1o    |
| <i>daf-16(mgDf47)</i>                            | 20 | 16.60±0.43 | 18 | 81/100  | <0.001 | 1o    |
| <i>daf-16(mgDf47); xuEx1670[IL1::trpa-1]</i>     | 20 | 16.42±0.54 | 16 | 63/90   | <0.001 | 1o    |
| <i>daf-16(mgDf47); xuEx2463[Prgef-1::daf-16]</i> | 20 | 16.98±0.46 | 19 | 70/84   | <0.001 | 1o    |
| <i>daf-16(mgDf47); xuEx2463; xuEX1670</i>        | 20 | 16.58±0.57 | 17 | 54/75   | <0.001 | 1o    |
| WT                                               | 20 | 19.87±0.58 | 21 | 62/89   | —      | Exp.2 |
| <i>xuEX1670[IL1::trpa-1]</i>                     | 20 | 22.75±0.54 | 23 | 51/82   | <0.001 |       |
| <i>daf-16(mgDf47)</i>                            | 20 | 17.10±0.39 | 18 | 76/100  | <0.001 |       |
| <i>daf-16(mgDf47); xuEx1670[IL1::trpa-1]</i>     | 20 | 16.42±0.54 | 16 | 63/90   | <0.001 |       |
| <i>daf-16(mgDf47); xuEx2302[Pges-1::daf-16]</i>  | 20 | 21.73±0.41 | 21 | 129/163 | <0.001 |       |
| <i>daf-16(mgDf47); xuEx2302; xuEx1670</i>        | 20 | 24.69±0.65 | 24 | 70/109  | <0.001 |       |
| <i>daf-16; xuEx2463[Prgef-1::daf-16]</i>         | 20 | 18.21±0.35 | 19 | 85/99   | 0.003  |       |
| <i>daf-16(mgDf47); xuEx2463; xuEX1670</i>        | 20 | 17.47±0.47 | 19 | 69/89   | <0.001 |       |
| <i>unc-13(e51)</i>                               | 20 | 23.49±1.03 | 22 | 77/101  | —      | 2a    |
| <i>unc-13(e51); xuEx1670[IL1::trpa-1]</i>        | 20 | 22.90±0.99 | 22 | 96/103  | 0.778  | 2a    |
| <i>unc-13(e51)</i>                               | 20 | 30.00±1.22 | 31 | 72/94   | —      | Exp.2 |
| <i>unc-13(e51); xuEx1670[IL1::trpa-1]</i>        | 20 | 30.60±1.12 | 29 | 75/94   | 0.819  |       |
| <i>unc-31(e169)</i>                              | 20 | 22.51±0.63 | 23 | 82/102  | —      | 2b    |
| <i>unc-31(e169); xuEx1670[IL1::trpa-1]</i>       | 20 | 26.21±0.62 | 27 | 91/104  | <0.001 | 2b    |
| <i>unc-31(e169)</i>                              | 20 | 21.96±0.66 | 23 | 108/111 | —      | Exp.2 |

Table S1 GENESDEV/2017/309625\_Zhang

|                                             |    |            |    |         |        |       |
|---------------------------------------------|----|------------|----|---------|--------|-------|
| <i>unc-31(e169); xuEx1670[IL1::trpa-1]</i>  | 20 | 25.14±0.93 | 25 | 100/107 | <0.001 |       |
| WT                                          | 20 | 19.30±0.70 | 20 | 71/101  | —      | 2c&2d |
| <i>xuEx1670[IL1::trpa-1]</i>                | 20 | 23.18±0.76 | 24 | 63/90   | <0.001 | 2c&2d |
| <i>xuEx165c [IL1::unc-13(RNAi)]</i>         | 20 | 16.49±0.50 | 15 | 77/89   | <0.001 | 2c    |
| <i>xuEx165c; xuEx1670</i>                   | 20 | 15.73±0.56 | 15 | 60/81   | <0.001 | 2c    |
| <i>xuEx163c [IL1::unc-31(RNAi)]</i>         | 20 | 19.27±0.60 | 20 | 66/89   | 0.458  | 2d    |
| <i>xuEx163c; xuEx1670</i>                   | 20 | 22.98±0.64 | 23 | 67/89   | <0.001 | 2d    |
| WT                                          | 20 | 18.64±0.61 | 17 | 71/101  | —      | Exp.2 |
| <i>xuEx1670[IL1::trpa-1]</i>                | 20 | 21.86±0.71 | 23 | 63/90   | <0.001 |       |
| <i>xuEx165c[IL1::unc-13(RNAi)]</i>          | 20 | 16.40±0.56 | 15 | 77/89   | 0.006  |       |
| <i>xuEx165c; xuEx1670</i>                   | 20 | 16.57±0.56 | 15 | 60/81   | 0.011  |       |
| <i>xuEx163c [IL1::unc-31(RNAi)]</i>         | 20 | 19.13±0.53 | 18 | 66/89   | 0.53   |       |
| <i>xuEx163c; xuEx1670</i>                   | 20 | 23.04±0.81 | 23 | 67/89   | <0.001 |       |
| <i>eat-4(ky5)</i>                           | 20 | 20.23±0.59 | 20 | 52/90   | —      | 2e    |
| <i>eat-4(ky5); xuEx1670[IL1::trpa-1]</i>    | 20 | 20.65±0.68 | 22 | 49/79   | 0.660  | 2e    |
| <i>eat-4(ky5)</i>                           | 20 | 21.63±0.43 | 21 | 81/99   | —      | Exp.2 |
| <i>eat-4(ky5); xuEx1670[IL1::trpa-1]</i>    | 20 | 21.62±0.61 | 21 | 57/87   | 0.646  |       |
| WT                                          | 20 | 19.98±0.46 | 22 | 73/98   | —      | 2f    |
| <i>xuEx1670[IL1::trpa-1]</i>                | 20 | 23.20±0.46 | 24 | 70/102  | <0.001 | 2f    |
| <i>xuEx2269[IL1::eat-4(RNAi)]</i>           | 20 | 15.87±0.62 | 18 | 96/99   | <0.001 | 2f    |
| <i>xuEx2269; xuEx1670</i>                   | 20 | 16.86±0.75 | 18 | 56/61   | 0.006  | 2f    |
| WT                                          | 20 | 20.46±0.51 | 22 | 80/103  | —      | Exp.2 |
| <i>xuEx1670[IL1::trpa-1]</i>                | 20 | 22.92±0.53 | 24 | 62/90   | 0.001  |       |
| <i>xuEx2269[IL1::eat-4(RNAi)]</i>           | 20 | 17.47±0.55 | 18 | 99/103  | <0.001 |       |
| <i>xuEx2269; xuEx1670</i>                   | 20 | 18.27±0.66 | 18 | 64/68   | 0.029  |       |
| <i>mgl-1(tm1811)</i>                        | 20 | 20.82±0.69 | 20 | 64/100  | —      | 2h    |
| <i>mgl-1(tm1811); xuEx1670[IL1::trpa-1]</i> | 20 | 20.27±0.69 | 20 | 61/94   | 0.414  | 2h    |
| <i>mgl-1(tm1811)</i>                        | 20 | 19.88±0.70 | 21 | 55/88   | —      | Exp.2 |
| <i>mgl-1(tm1811); xuEx1670[IL1::trpa-1]</i> | 20 | 18.33±0.80 | 19 | 57/89   | 0.319  |       |
| <i>unc-25(e156)</i>                         | 20 | 21.73±0.67 | 22 | 78/105  | —      | 3a    |
| <i>unc-25(e156); xuEx1670[IL1::trpa-1]</i>  | 20 | 27.33±0.79 | 28 | 75/101  | <0.001 | 3a    |
| <i>unc-25(e156)</i>                         | 20 | 21.30±0.71 | 22 | 73/101  | —      | Exp.2 |
| <i>unc-25(e156); xuEx1670[IL1::trpa-1]</i>  | 20 | 23.28±0.95 | 26 | 65/96   | 0.007  |       |
| <i>cat-2(e1112)</i>                         | 20 | 19.65±0.66 | 20 | 65/95   | —      | 3b    |
| <i>cat-2(e1112); xuEx1670[IL1::trpa-1]</i>  | 20 | 23.47±0.66 | 24 | 73/100  | <0.001 | 3b    |
| <i>cat-2(e1112)</i>                         | 20 | 19.70±0.62 | 20 | 74/101  | —      | Exp.2 |
| <i>cat-2(e1112); xuEx1670[IL1::trpa-1]</i>  | 20 | 22.43±0.54 | 22 | 84/106  | 0.003  |       |
| <i>tbh-1(n3247)</i>                         | 20 | 19.65±0.66 | 20 | 65/95   | —      | 3c    |
| <i>tbh-1(n3247); xuEx1670[IL1::trpa-1]</i>  | 20 | 23.47±0.66 | 24 | 73/100  | <0.001 | 3c    |
| <i>tbh-1(n3247)</i>                         | 20 | 19.70±0.62 | 20 | 74/101  | —      | Exp.2 |
| <i>tbh-1(n3247); xuEx1670[IL1::trpa-1]</i>  | 20 | 22.43±0.54 | 22 | 84/106  | 0.003  |       |
| <i>tdc-1(n3419)</i>                         | 20 | 19.44±0.72 | 20 | 63/89   | —      | 3d    |
| <i>tdc-1(n3419); xuEx1670[IL1::trpa-1]</i>  | 20 | 22.52±0.69 | 24 | 73/101  | 0.002  | 3d    |

Table S1 GENESDEV/2017/309625\_Zhang

|                                                             |    |            |    |         |        |       |
|-------------------------------------------------------------|----|------------|----|---------|--------|-------|
| <i>tdc-1(n3419)</i>                                         | 20 | 19.27±0.60 | 20 | 82/124  | —      | Exp.2 |
| <i>tdc-1(n3419); xuEx1670[IL1::trpa-1]</i>                  | 20 | 21.44±0.47 | 22 | 114/144 | 0.006  |       |
| <i>unc-17(e245)</i>                                         | 20 | 18.10±0.56 | 18 | 91/100  | —      | 3e    |
| <i>unc-17(e245); xuEx1670[IL1::trpa-1]</i>                  | 20 | 20.84±0.65 | 22 | 84/101  | <0.001 | 3e    |
| <i>unc-17(e245)</i>                                         | 20 | 17.36±0.62 | 16 | 97/102  | —      | Exp.2 |
| <i>unc-17(e245); xuEx1670[IL1::trpa-1]</i>                  | 20 | 19.29±0.69 | 20 | 92/99   | 0.016  |       |
| <i>tph-1(mg280)</i>                                         | 20 | 20.84±0.71 | 22 | 66/91   | —      | 3f    |
| <i>tph-1(mg280); xuEx1670[IL1::trpa-1]</i>                  | 20 | 19.94±0.81 | 20 | 54/90   | 0.529  | 3f    |
| <i>tph-1(mg280)</i>                                         | 20 | 21.63±0.63 | 22 | 70/105  | —      | Exp.2 |
| <i>tph-1(mg280); xuEx1670[IL1::trpa-1]</i>                  | 20 | 20.20±0.64 | 20 | 71/101  | 0.162  |       |
| WT                                                          | 20 | 17.70±0.58 | 18 | 58/91   | —      | 3g    |
| <i>xuEx1670[IL1::trpa-1]</i>                                | 20 | 21.14±0.74 | 22 | 65/90   | <0.001 | 3g&3h |
| <i>mgl-1(tm1811)</i>                                        | 20 | 17.62±0.81 | 17 | 54/83   | 0.483  | 3g    |
| <i>mgl-1(tm1811); xuEx1670[IL1::trpa-1]</i>                 | 20 | 17.87±0.71 | 17 | 56/91   | 0.294  | 3g&3h |
| <i>mgl-1(tm1811); xuEx1670;<br/>xuEx2364[Ptph-1::mgl-1]</i> | 20 | 22.89±0.96 | 23 | 50/85   | <0.001 | 3g    |
| <i>mgl-1(tm1811); xuEx1670;<br/>xuEx2331[NSM::mgl-1]</i>    | 20 | 23.89±0.86 | 23 | 56/83   | <0.001 | 3h    |
| <i>mgl-1(tm1811); xuEx1670;<br/>xuEx2378[ADF::mgl-1]</i>    | 20 | 18.71±0.60 | 18 | 70/100  | 0.094  | 3h    |
| WT                                                          | 20 | 20.09±0.58 | 22 | 78/108  | —      | Exp.2 |
| <i>xuEx1670[IL1::trpa-1]</i>                                | 20 | 23.25±0.60 | 24 | 71/101  | <0.001 |       |
| <i>mgl-1(tm1811)</i>                                        | 20 | 18.42±0.67 | 20 | 59/91   | 0.081  |       |
| <i>mgl-1(tm1811); xuEx1670[IL1::trpa-1]</i>                 | 20 | 19.35±0.73 | 20 | 63/96   | 0.908  |       |
| <i>mgl-1(tm1811); xuEx1670;<br/>xuEx2364[Ptph-1::mgl-1]</i> | 20 | 23.06±0.96 | 24 | 58/82   | <0.001 |       |
| <i>mgl-1(tm1811); xuEx1670;<br/>xuEx2331[NSM::mgl-1]</i>    | 20 | 23.36±0.73 | 25 | 82/110  | <0.001 |       |
| <i>mgl-1(tm1811); xuEx1670;<br/>xuEx2378[ADF::mgl-1]</i>    | 20 | 19.66±0.61 | 20 | 71/103  | 0.688  |       |
| WT                                                          | 20 | 21.55±0.61 | 22 | 85/100  | —      | 3i    |
| <i>xuEx1670[IL1::trpa-1]</i>                                | 20 | 24.66±0.71 | 26 | 63/96   | 0.001  | 3i    |
| <i>xuEx31c[NSM::TeTx]</i>                                   | 20 | 19.04±0.58 | 20 | 70/90   | 0.001  | 3i    |
| <i>xuEx31c; xuEx1670</i>                                    | 20 | 18.92±0.59 | 20 | 76/97   | 0.001  | 3i    |
| WT                                                          | 20 | 21.29±0.56 | 23 | 84/98   | —      | Exp.2 |
| <i>xuEx1670[IL1::trpa-1]</i>                                | 20 | 24.04±0.71 | 25 | 65/99   | <0.001 |       |
| <i>xuEx31c[NSM::TeTx]</i>                                   | 20 | 18.58±0.61 | 18 | 70/91   | 0.001  |       |
| <i>xuEx31c; xuEx1670</i>                                    | 20 | 19.08±0.58 | 20 | 76/96   | 0.005  |       |
| WT                                                          | 20 | 18.20±0.57 | 20 | 64/96   | —      | 3j    |
| <i>xuEx2331[NSM::mgl-1]</i>                                 | 20 | 21.51±0.54 | 22 | 76/106  | <0.001 | 3j    |
| <i>daf-16(mgDf47)</i>                                       | 20 | 14.95±0.50 | 14 | 64/88   | <0.001 | 3j    |
| <i>daf-16(mgDf47); xuEx2331</i>                             | 20 | 14.90±0.49 | 14 | 64/97   | <0.001 | 3j    |
| WT                                                          | 20 | 20.22±0.51 | 20 | 68/101  | —      | Exp.2 |
| <i>xuEx2331[NSM::mgl-1]</i>                                 | 20 | 22.87±0.67 | 24 | 68/98   | <0.001 |       |
| <i>daf-16(mgDf47)</i>                                       | 20 | 18.04±0.40 | 18 | 84/101  | <0.001 |       |
| <i>daf-16(mgDf47); xuEx2331</i>                             | 20 | 17.52±0.42 | 18 | 82/103  | <0.001 |       |
| WT                                                          | 20 | 20.26±0.41 | 21 | 79/104  | —      | 3k    |
| <i>xuEx2295[NSM::syntaxin(T254I)]</i>                       | 20 | 23.01±0.59 | 23 | 65/87   | <0.001 | 3k    |

Table S1 GENESDEV/2017/309625\_Zhang

|                                                             |    |            |    |         |        |       |
|-------------------------------------------------------------|----|------------|----|---------|--------|-------|
| <i>daf-16(mgDf47)</i>                                       | 20 | 15.85±0.31 | 17 | 99/101  | <0.001 | 3k    |
| <i>daf-16(mgDf47); xuEx2295</i>                             | 20 | 15.89±0.34 | 17 | 90/95   | <0.001 | 3k    |
| WT                                                          | 20 | 18.76±0.65 | 20 | 64/83   | —      | Exp.2 |
| <i>xuEx2295[NSM::syntaxin(T254I)]</i>                       | 20 | 21.23±0.67 | 22 | 73/102  | 0.001  |       |
| <i>daf-16(mgDf47)</i>                                       | 20 | 15.68±0.50 | 16 | 70/96   | <0.001 |       |
| <i>daf-16(mgDf47); xuEx2295</i>                             | 20 | 16.21±0.41 | 16 | 92/104  | <0.001 |       |
| <i>ser-7(tm1325)</i>                                        | 20 | 19.00±0.38 | 20 | 78/107  | —      | 4b    |
| <i>ser-7(tm1325); xuEx1670[IL1::trpa-1]</i>                 | 20 | 19.05±0.66 | 21 | 55/93   | 0.149  | 4b    |
| <i>ser-7(tm1325); xuEx2331[NSM::mgl-1]</i>                  | 20 | 19.35±0.42 | 20 | 69/99   | 0.483  | 4b    |
| <i>ser-7(tm1325)</i>                                        | 20 | 20.57±0.40 | 20 | 75/100  | —      | Exp.2 |
| <i>ser-7(tm1325); xuEx1670[IL1::trpa-1]</i>                 | 20 | 21.06±0.62 | 22 | 69/94   | 0.052  |       |
| <i>ser-7(tm1325); xuEx2331[NSM::mgl-1]</i>                  | 20 | 19.36±0.44 | 20 | 71/98   | 0.076  |       |
| WT                                                          | 20 | 18.66±0.49 | 19 | 63/99   | —      | 4c    |
| <i>xuEx1670[IL1::trpa-1]</i>                                | 20 | 21.77±0.65 | 23 | 72/100  | <0.001 | 4c    |
| <i>ser-7(tm1325)</i>                                        | 20 | 18.28±0.61 | 19 | 60/89   | 0.761  | 4c    |
| <i>ser-7(tm1325); xuEx1670[IL1::trpa-1]</i>                 | 20 | 18.77±0.65 | 19 | 71/96   | 0.202  | 4c    |
| <i>ser-7(tm1325); xuEx1670;<br/>xuEx2330[Pges-1::ser-7]</i> | 20 | 22.90±0.76 | 23 | 66/92   | <0.001 | 4c    |
| WT                                                          | 20 | 18.26±0.63 | 19 | 56/83   | —      | Exp.2 |
| <i>xuEx1670[IL1::trpa-1]</i>                                | 20 | 21.92±0.72 | 23 | 57/90   | <0.001 |       |
| <i>ser-7(tm1325)</i>                                        | 20 | 19.09±0.50 | 19 | 58/91   | 0.757  |       |
| <i>ser-7(tm1325); xuEx1670[IL1::trpa-1]</i>                 | 20 | 18.82±0.62 | 19 | 49/81   | 0.761  |       |
| <i>ser-7(tm1325); xuEx1670;<br/>xuEx2330[Pges-1::ser-7]</i> | 20 | 23.24±0.73 | 23 | 50/80   | <0.001 |       |
| vector RNAi                                                 | 20 | 19.76±0.45 | 21 | 102/108 | —      | 4d    |
| vector RNAi; <i>xuEx2395[Pges-1::ser-7]</i>                 | 20 | 22.84±0.58 | 23 | 78/97   | <0.001 | 4d    |
| <i>daf-16(RNAi)</i>                                         | 20 | 14.97±0.45 | 15 | 62/92   | <0.001 | 4d    |
| <i>daf-16(RNAi); xuEx2395</i>                               | 20 | 15.37±0.43 | 15 | 64/94   | <0.001 | 4d    |
| vector RNAi                                                 | 20 | 20.61±0.55 | 21 | 86/95   | —      | Exp.2 |
| vector RNAi; <i>xuEx2395[Pges-1::ser-7]</i>                 | 20 | 23.21±0.72 | 25 | 77/97   | <0.001 |       |
| <i>daf-16(RNAi)</i>                                         | 20 | 18.17±0.46 | 19 | 89/100  | <0.001 |       |
| <i>daf-16(RNAi); xuEx2395</i>                               | 20 | 17.64±0.57 | 19 | 89/98   | <0.001 |       |
| WT                                                          | 25 | 10.52±0.39 | 11 | 72/100  | —      | 5c    |
| <i>xuEx2070[ASJ::TeTx]</i>                                  | 25 | 14.83±0.48 | 14 | 77/100  | <0.001 | 5c    |
| WT                                                          | 25 | 10.21±0.52 | 10 | 75/100  | —      | Exp.2 |
| <i>xuEx2070[ASJ::TeTx]</i>                                  | 25 | 13.03±0.36 | 13 | 70/100  | <0.001 |       |
| WT                                                          | 20 | 20.41±0.42 | 20 | 77/100  | —      | 5d    |
| <i>xuEx2070[ASJ::TeTx]</i>                                  | 20 | 21.51±0.37 | 21 | 77/100  | 0.198  | 5d    |
| WT                                                          | 20 | 18.89±0.34 | 19 | 79/100  | —      | Exp.2 |
| <i>xuEx2070[ASJ::TeTx]</i>                                  | 20 | 20.42±0.27 | 20 | 69/100  | 0.088  |       |
| WT                                                          | 25 | 11.02±0.44 | 10 | 78/100  | —      | 5e    |
| <i>xuEx2070[ASJ::TeTx]</i>                                  | 25 | 14.00±0.48 | 14 | 70/100  | <0.001 | 5e    |
| <i>xuEx2415[ASJ::tax-4(RNAi)]</i>                           | 25 | 14.37±0.39 | 14 | 58/80   | <0.001 | 5e    |
| <i>xuEx2387[ASJ::tax-2(RNAi)]</i>                           | 25 | 14.02±0.12 | 14 | 62/80   | <0.001 | 5e    |

Table S1 GENESDEV/2017/309625\_Zhang

|                                                                      |    |            |    |        |        |       |
|----------------------------------------------------------------------|----|------------|----|--------|--------|-------|
| WT                                                                   | 25 | 10.75±0.34 | 11 | 75/100 | —      | Exp.2 |
| <i>xuEx2070[ASJ::TeTx]</i>                                           | 25 | 13.97±0.34 | 14 | 74/100 | <0.001 |       |
| <i>xuEx2415[ASJ::tax-4(RNAi)]</i>                                    | 25 | 13.83±0.40 | 14 | 65/80  | <0.001 |       |
| <i>xuEx2387[ASJ::tax-2(RNAi)]</i>                                    | 25 | 13.77±0.71 | 14 | 66/80  | <0.001 |       |
| WT                                                                   | 25 | 10.19±0.23 | 10 | 80/100 | —      | 5f    |
| <i>xuEx2291[ASJ::syntaxin(T254I)]</i>                                | 25 | 6.66±0.28  | 7  | 62/70  | <0.001 | 5f    |
| WT                                                                   | 25 | 10.62±0.86 | 11 | 76/100 | —      | Exp.2 |
| <i>xuEx2291[ASJ::syntaxin(T254I)]</i>                                | 25 | 6.76±0.25  | 7  | 60/70  | <0.001 |       |
| WT                                                                   | 25 | 10.52±0.41 | 10 | 70/100 | —      | 5g    |
| <i>daf-16(mgDf47)</i>                                                | 25 | 8.29±0.35  | 8  | 65/80  | <0.001 | 5g    |
| <i>xuEx2070[ASJ::TeTx]</i>                                           | 25 | 14.11±0.42 | 14 | 79/100 | <0.001 | 5g    |
| <i>daf-16(mgDf47); xuEx2070</i>                                      | 25 | 8.20±0.31  | 8  | 62/84  | <0.001 | 5g    |
| <i>daf-16(mgDf47); xuEx2070;</i><br><i>xuEx2416[Pges-1::daf-16]</i>  | 25 | 13.50±0.46 | 14 | 63/80  | <0.001 | 5g    |
| <i>daf-16(mgDf47); xuEx2070;</i><br><i>xuEx2418[Prgef-1::daf-16]</i> | 25 | 7.76±0.31  | 7  | 68/80  | <0.001 | 5g    |
| WT                                                                   | 25 | 10.77±0.21 | 11 | 76/100 | —      | Exp.2 |
| <i>daf-16(mgDf47)</i>                                                | 25 | 8.05±0.68  | 8  | 60/80  | <0.001 |       |
| <i>xuEx2070[ASJ::TeTx]</i>                                           | 25 | 13.91±0.12 | 14 | 83/100 | <0.001 |       |
| <i>daf-16(mgDf47); xuEx2070</i>                                      | 25 | 8.11±0.56  | 8  | 60/85  | <0.001 |       |
| <i>daf-16(mgDf47); xuEx2070;</i><br><i>xuEx2416[Pges-1::daf-16]</i>  | 25 | 13.52±0.61 | 14 | 59/80  | <0.001 |       |
| <i>daf-16(mgDf47); xuEx2070;</i><br><i>xuEx2418[Prgef-1::daf-16]</i> | 25 | 7.57±0.55  | 8  | 65/83  | <0.001 |       |
| WT                                                                   | 25 | 10.25±0.38 | 10 | 73/100 | —      | 6a    |
| <i>xuEx2083[ASJ::unc-13(RNAi)]</i>                                   | 25 | 10.68±0.39 | 11 | 80/100 | 0.539  | 6a    |
| <i>xuEx2113[ASJ::unc-31(RNAi)]</i>                                   | 25 | 14.08±0.36 | 14 | 80/100 | <0.001 | 6a    |
| WT                                                                   | 25 | 10.27±0.29 | 10 | 78/100 | —      | Exp.2 |
| <i>xuEx2083[ASJ::unc-13(RNAi)]</i>                                   | 25 | 10.33±0.34 | 10 | 77/100 | 0.348  |       |
| <i>xuEx2113[ASJ::unc-31(RNAi)]</i>                                   | 25 | 13.86±0.58 | 14 | 82/100 | <0.001 |       |
| vector RNAi                                                          | 25 | 10.03±0.14 | 10 | 70/100 | —      | 6b    |
| vector RNAi; <i>xuEx2140[ASJ::ins-6(RNAi)]</i>                       | 25 | 12.02±0.35 | 12 | 68/100 | <0.001 | 6b    |
| vector RNAi; <i>xuEx2141[ASJ::daf-28(RNAi)]</i>                      | 25 | 12.56±0.11 | 12 | 66/100 | <0.001 | 6b    |
| vector RNAi; <i>xuEx2133</i><br><i>[ASJ::ins-6+daf-28(RNAi)]</i>     | 25 | 13.79±0.62 | 14 | 65/100 | <0.001 | 6b    |
| <i>daf-16(RNAi)</i>                                                  | 25 | 7.89±0.45  | 8  | 68/100 | <0.001 | 6b    |
| <i>daf-16(RNAi); xuEx2140</i>                                        | 25 | 7.59±0.78  | 8  | 62/100 | <0.001 | 6b    |
| <i>daf-16(RNAi); xuEx2141</i>                                        | 25 | 7.73±0.53  | 8  | 71/100 | <0.001 | 6b    |
| <i>daf-16(RNAi); xuEx2133</i>                                        | 25 | 7.94±0.27  | 8  | 70/100 | <0.001 | 6b    |
| vector RNAi                                                          | 25 | 10.36±0.13 | 10 | 76/100 | —      | Exp.2 |
| vector RNAi; <i>xuEx2140[ASJ::ins-6(RNAi)]</i>                       | 25 | 11.77±0.83 | 12 | 63/100 | <0.001 |       |
| vector RNAi; <i>xuEx2141[ASJ::daf-28(RNAi)]</i>                      | 25 | 12.21±0.41 | 12 | 67/100 | <0.001 |       |
| vector RNAi; <i>xuEx2133</i><br><i>[ASJ::ins-6+daf-28(RNAi)]</i>     | 25 | 13.45±0.18 | 13 | 75/100 | <0.001 |       |
| <i>daf-16(RNAi)</i>                                                  | 25 | 8.03±0.29  | 8  | 64/100 | <0.001 |       |
| <i>daf-16(RNAi); xuEx2140</i>                                        | 25 | 8.15±0.35  | 8  | 68/100 | <0.001 |       |
| <i>daf-16(RNAi); xuEx2141</i>                                        | 25 | 7.78±0.85  | 8  | 66/100 | <0.001 |       |
| <i>daf-16(RNAi); xuEx2133</i>                                        | 25 | 8.31±0.13  | 8  | 63/100 | <0.001 |       |
| <i>xuEx2291[ASJ::syntaxin(T254I)]</i>                                | 25 | 7.89±0.41  | 8  | 57/70  | —      | 6c    |
| <i>ins-6(tm2416); daf-28(tm2308)</i>                                 | 25 | 11.87±0.38 | 12 | 78/100 | <0.001 | 6c    |

Table S1 GENESDEV/2017/309625\_Zhang

|                                                |    |            |    |        |        |       |
|------------------------------------------------|----|------------|----|--------|--------|-------|
| <i>ins-6(tm2416); daf-28(tm2308); xuEx2291</i> | 25 | 11.51±0.37 | 11 | 77/100 | <0.001 | 6c    |
| <i>xuEx2291[ASJ::syntaxin(T254I)]</i>          | 25 | 7.77±0.58  | 8  | 55/70  | —      | Exp.2 |
| <i>ins-6(tm2416); daf-28(tm2308)</i>           | 25 | 10.91±0.57 | 11 | 80/100 | <0.001 |       |
| <i>ins-6(tm2416); daf-28(tm2308); xuEx2291</i> | 25 | 11.03±0.43 | 11 | 79/100 | <0.001 |       |
| WT                                             | 25 | 10.01±0.36 | 10 | 76/100 | —      | 6d    |
| <i>daf-2(e1368)</i>                            | 25 | 25.66±0.43 | 26 | 80/100 | <0.001 | 6d    |
| <i>xuEx2070[ASJ::TeTx]</i>                     | 25 | 13.87±0.73 | 14 | 70/100 | <0.001 | 6d    |
| <i>daf-2(e1368); xuEx2070</i>                  | 25 | 26.35±0.40 | 26 | 63/70  | <0.001 | 6d    |
| WT                                             | 25 | 10.32±0.25 | 10 | 72/100 | —      | Exp.2 |
| <i>daf-2(e1368)</i>                            | 25 | 26.77±0.52 | 27 | 84/100 | <0.001 |       |
| <i>xuEx2070[ASJ::TeTx]</i>                     | 25 | 13.14±0.33 | 13 | 68/100 | <0.001 |       |
| <i>daf-2(e1368); xuEx2070</i>                  | 25 | 26.21±0.46 | 26 | 58/70  | <0.001 |       |
| WT                                             | 25 | 11.24±0.35 | 11 | 76/100 | —      | 6e    |
| <i>daf-2(e1368)</i>                            | 25 | 27.44±0.38 | 27 | 79/100 | <0.001 | 6e    |
| <i>xuEx2291[ASJ::syntaxin(T254I)]</i>          | 25 | 7.63±0.65  | 8  | 58/70  | <0.001 | 6e    |
| <i>daf-2(e1368); xuEx2291</i>                  | 25 | 27.03±0.28 | 27 | 57/70  | <0.001 | 6e    |
| WT                                             | 25 | 9.97±0.62  | 10 | 81/100 | —      | Exp.2 |
| <i>daf-2(e1368)</i>                            | 25 | 25.76±0.55 | 26 | 77/100 | <0.001 |       |
| <i>xuEx2291[ASJ::syntaxin(T254I)]</i>          | 25 | 8.46±0.19  | 8  | 52/70  | <0.001 |       |
| <i>daf-2(e1368); xuEx2291</i>                  | 25 | 26.12±0.37 | 26 | 55/70  | <0.001 |       |
| <i>daf-2(e1368)</i>                            | 25 | 27.44±0.38 | 27 | 79/100 | —      | 6f    |
| <i>daf-2(e1368); xuEx2537[Pges-1::daf-2]</i>   | 25 | 21.26±0.39 | 21 | 63/70  | <0.001 | 6f    |
| <i>daf-2(e1368); xuEx2538[Prgef-1::daf-2]</i>  | 25 | 18.48±0.29 | 18 | 60/70  | <0.001 | 6f    |
| <i>daf-2(e1368); xuEx2537;</i>                 | 25 | 12.33±0.40 | 12 | 57/70  | <0.001 | 6f    |
| <i>xuEx2291[ASJ::syntaxin(T254I)]</i>          | 25 | 17.84±0.49 | 18 | 55/70  | <0.001 | 6f    |
| <i>daf-2(e1368); xuEx2538; xuEx2291</i>        | 25 | 17.84±0.49 | 18 | 55/70  | <0.001 | 6f    |
| <i>daf-2(e1368)</i>                            | 25 | 25.76±0.55 | 26 | 77/100 | —      | Exp.2 |
| <i>daf-2(e1368); xuEx2537[Pges-1::daf-2]</i>   | 25 | 21.78±0.60 | 22 | 63/70  | <0.001 |       |
| <i>daf-2(e1368); xuEx2538[Prgef-1::daf-2]</i>  | 25 | 19.34±0.24 | 19 | 60/70  | <0.001 |       |
| <i>daf-2(e1368); xuEx2537;</i>                 | 25 | 11.73±0.56 | 12 | 57/70  | <0.001 |       |
| <i>xuEx2291[ASJ::syntaxin(T254I)]</i>          | 25 | 17.79±0.42 | 18 | 55/70  | <0.001 |       |
| <i>daf-2(e1368); xuEx2538; xuEx2291</i>        | 25 | 17.79±0.42 | 18 | 55/70  | <0.001 |       |

**Note:** two sets of lifespan data are listed for each experiment. The first set is graphed in the figures. The second set (replicates) is shown here as “Exp. 2”. The Log-rank (Mantel-Cox) test was used for statistical analysis.
