# Supplementary material for: Brain–gut communications via distinct neuroendocrine signals bidirectionally regulate longevity in C. elegans
Source: PubMed Central journal article supplement — Genes Dev. 2018 Feb 1;32(3-4):258–70. doi: 10.1101/gad.309625.117 (PMC5859967; doi:10.1101/gad.309625.117), 2018-02-01
Supplement: supp_32.3-4.258_Supplemental_Table_S2.pdf [file supp_32.3-4.258_Supplemental_Table_S2.pdf]

Table S2 GENESDEV/2017/309625\_Zhang

| Identifier | Strains                                                                   |
|------------|---------------------------------------------------------------------------|
| TQ3030     | N2(Wild-Type)                                                             |
| TQ1516     | <i>trpa-1(ok999)</i>                                                      |
| TQ1648     | <i>xuEx606[Prgef-1::trpa-1::sl2::yfp]</i>                                 |
| TQ4411     | <i>xuEx1372[Posm-6::trpa-1::sl2::yfp]</i>                                 |
| TQ4730     | <i>xuEx1382[Pglr-1::trpa-1::sl2::mcherry]</i>                             |
| TQ4724     | <i>xuEx1362[Pacr-2::trpa-1::sl2::yfp]</i>                                 |
| TQ4406     | <i>xuEx1366[Punc-25::trpa-1::sl2::yfp]</i>                                |
| TQ5521     | <i>xuEx1670[Paqp-6::trpa-1::sl2::yfp]</i>                                 |
| TQ6781     | <i>xuEx2462[Paqp-6::trpa-1::sl2::cfp]</i>                                 |
| TQ5670     | <i>xuEx1911[Paakg1::sl2::mcherry + Paakg1::GCaMP6(f)]</i>                 |
| TQ6558     | <i>xuEx2367[Paqp-6::syntaxin(T254I)::sl2::yfp]</i>                        |
| TQ6194     | <i>xuEx2139[Prgef-1::flpase+Paakg1::frt2::TeTx+Paakg1::frt2::mcherry]</i> |
| TQ4077     | <i>daf-16(mgDf47)</i>                                                     |
| TQ5695     | <i>daf-16(mgDf47); xuEx1670</i>                                           |
| TQ6481     | <i>daf-16(mgDf47); xuEx2302[Pges-1::daf-16::sl2::mcherry]</i>             |
| TQ6602     | <i>daf-16(mgDf47); xuEx1670; xuEx2302</i>                                 |
| TQ6782     | <i>daf-16(mgDf47); xuEx2463[Prgef-1::daf-16::sl2::mcherry]</i>            |
| TQ6784     | <i>daf-16(mgDf47); xuEx1670; xuEx2463</i>                                 |
| TQ2178     | <i>unc-13(e51)</i>                                                        |
| TQ6899     | <i>unc-13(e51); xuEx1670</i>                                              |
| TQ1280     | <i>unc-31(e169)</i>                                                       |
| TQ6892     | <i>unc-31(e169); xuEx1670</i>                                             |
| TQC1761    | <i>xuEx165c[Paqp-6::unc-13 RNAi(S+AS)::sl2::mcherry]</i>                  |
| TQC1762    | <i>xuEx1670; xuEx165c</i>                                                 |
| TQC1765    | <i>xuEx163c[Paqp-6::unc-31 RNAi(S+AS)::sl2::mcherry]</i>                  |
| TQC1766    | <i>xuEx1670; xuEx163c</i>                                                 |
| TQ5694     | <i>eat-4(ky5)</i>                                                         |
| TQ5693     | <i>eat-4(ky5); xuEx1670</i>                                               |
| TQ6428     | <i>xuEx2269[Paqp-6::eat-4 RNAi(S+AS)::sl2::mcherry]</i>                   |
| TQ576      | <i>mgl-1(tm1811)</i>                                                      |
| TQ6181     | <i>mgl-1(tm1811); xuEx1670</i>                                            |
| TQ3698     | <i>unc-25(e156)</i>                                                       |
| TQ6195     | <i>unc-25(e156); xuEx1670</i>                                             |
| TQ4935     | <i>cat-2(e1112)</i>                                                       |
| TQ6186     | <i>cat-2(e1112); xuEx1670</i>                                             |
| TQ4927     | <i>tbh-1(n3247)</i>                                                       |
| TQ6187     | <i>tbh-1(n3247); xuEx1670</i>                                             |

Table S2 GENESDEV/2017/309625\_Zhang

---

|         |                                                                                               |
|---------|-----------------------------------------------------------------------------------------------|
| TQ4929  | <i>tdc-1(n3419)</i>                                                                           |
| TQ6188  | <i>tdc-1(n3419); xuEx1670</i>                                                                 |
| TQ6451  | <i>unc-17(e245)</i>                                                                           |
| TQ6829  | <i>unc-17(e245); xuEx1670.</i>                                                                |
| TQ4931  | <i>tph-1(mg280)</i>                                                                           |
| TQ6185  | <i>tph-1(mg280); xuEx1670</i>                                                                 |
| TQ6555  | <i>mgl-1(tm1811); xuEx1670; xuEx2364[Ptph-1(L)::mgl-1b::sl2::mcherry2]</i>                    |
| TQ6503  | <i>mgl-1(tm1811); xuEx1670; xuEx2331[Ptph-1(s)::mgl-1b::sl2::mcherry]</i>                     |
| TQ6580  | <i>mgl-1(tm1811); xuEx1670; xuEx2378[Ptph-1(bc)::mgl-1b::sl2::mcherry]</i>                    |
| TQC1397 | <i>xuEx31c[Ptph-1(s)::TeTx::sl2::mcherry]</i>                                                 |
| TQC1430 | <i>xuEx31c; xuEx1670</i>                                                                      |
| TQ6466  | <i>xuEx2295[Ptph-1(s)::syntaxin(T254I)::sl2::mcherry]</i>                                     |
| TQ6770  | <i>daf-16(mgDf47); xuEx2295</i>                                                               |
| TQ6767  | <i>daf-16(mgDf47); xuEx2331</i>                                                               |
| TQ616   | <i>ser-7(tm1325)</i>                                                                          |
| TQ6345  | <i>ser-7(tm1325); xuEx1670</i>                                                                |
| TQ6765  | <i>ser-7(tm1325); xuEx2331</i>                                                                |
| TQ6499  | <i>ser-7(tm1325); xuEx1670; xuEx2330[Pges-1::ser-7a::sl2::mcherry]</i>                        |
| TQ6789  | <i>xuEx2395[Pges-1::ser-7a::sl2::mcherry]</i>                                                 |
| TQ6026  | <i>xuEx2047[Paqp-6::trpa-1::sl2::mcherry]</i>                                                 |
| TJ356   | <i>zls356[daf-16::gfp + rol-6]</i>                                                            |
| TQ6027  | <i>ls[SOD-3::gfp]; xuEx2047</i>                                                               |
| TQ6028  | <i>zls356[daf-16::gfp + roller]; xuEx2047</i>                                                 |
| TQ6854  | <i>xuEx2501 [Ptrx-1::GCaMP6(f)+Ptrx-1::sl2::DsRed]</i>                                        |
| TQ6855  | <i>tax-2(p671); xuEx2501</i>                                                                  |
| TQ6856  | <i>tax-2(p671); tax-4(p678); xuEx2501</i>                                                     |
| TQ6081  | <i>xuEx2070[Ptrx-1::TeTx::sl2::yfp]</i>                                                       |
| TQ6650  | <i>xuEx2415[Ptrx-1::tax-4 RNAi(S+AS)::sl2::yfp]</i>                                           |
| TQ6590  | <i>xuEx2387[Ptrx-1::tax-2 RNAi(S+AS)::sl2::yfp]</i>                                           |
| TQ6462  | <i>xuEx2291[Ptrx-1::syntaxin(T254I)::sl2::yfp]</i>                                            |
| TQ6150  | <i>daf-16(mgDf47); xuEx2070</i>                                                               |
| TQ6478  | <i>daf-16(mgDf47); xuEx2070; xuEx2416[Pges-1::daf-16::sl2::mcherry]</i>                       |
| TQ6481  | <i>daf-16(mgDf47); xuEx2070; xuEx2418[Prgef-1::daf-16::sl2::mcherry]</i>                      |
| TQ6141  | <i>xuEx2083[Ptrx-1::unc-13RNAi(S+AS)::sl2::yfp]</i>                                           |
| TQ6155  | <i>xuEx2113[Ptrx-1::unc-31 RNAi(S+AS)::sl2::yfp]</i>                                          |
| TQ6196  | <i>xuEx2140[Ptrx-1::ins-6 RNAi(S+AS)::sl2::yfp]</i>                                           |
| TQ6197  | <i>xuEx2141[Ptrx-1::daf-28 RNAi(S+AS)::sl2::yfp]</i>                                          |
| TQ6179  | <i>xuEx2133[Ptrx-1::ins-6 RNAi(S+AS)::sl2::yfp + Ptrx-1::daf-28 RNAi(S+AS)::sl2::mcherry]</i> |
| TQ6836  | <i>ins-6(tm2416); daf-28(tm2308)</i>                                                          |
| TQ6974  | <i>ins-6(tm2416); daf-28(tm2308); xuEx2291</i>                                                |
| TQ545   | <i>daf-2(e1368)</i>                                                                           |
| TQ6587  | <i>daf-2(e1368); xuEx2070</i>                                                                 |
| TQ6583  | <i>daf-2(e1368); xuEx2291</i>                                                                 |

---

---

|        |                                                             |
|--------|-------------------------------------------------------------|
| TQ6459 | <i>daf-2(e1368); xuEx2537[Pges-1::daf-2::sl2::mcherry]</i>  |
| TQ6461 | <i>daf-2(e1368); xuEx2538[Prgef-1::daf-2::sl2::mcherry]</i> |
| TQ6755 | <i>daf-2(e1368); xuEx2537; xuEx2291</i>                     |
| TQ6758 | <i>daf-2(e1368); xuEx2538; xuEx2291</i>                     |
| TQ7127 | <i>ls[SOD-3::gfp]; xuEx2070</i>                             |
| TQ7123 | <i>zls356[daf-16::gfp + rol-6]; xuEx2070</i>                |

---

**Note:** All mutants have been outcrossed to N2 strain for four to eight times before performing lifespan assay.
